# Supplementary material for: Using comparative genomics to understand molecular features of carbapenem-resistant Acinetobacter baumannii from South Korea causing invasive infections and their clinical implications
Source: PLoS One. 2020 Feb 21;15(2):e0229416. doi: 10.1371/journal.pone.0229416 (PMC7034955; doi:10.1371/journal.pone.0229416)
Supplement: S2 Table — (XLSX) [file pone.0229416.s002.xlsx]

## Sheet: Sheet1
Supplementary Table S2. Sequencing and assembly statistics.
		Sequencing statistics					Assembly statistics (whole-genome, CLC)						Assembly statistics (plasmidSPAdes)					Assembly statistics (plasmid profiler-based)					Number of prophages
Strain	BioSample	Basepairs	No. of reads	Average length	Sequencing coverage	GenBank	N50	Maximum	Average	Count	Total bps	Strain	N50	Maximum	Average	Count	Total bps	N50	Maximum	Average	Count	Total bps	Total	Intact	Incomplete	Questinable
ABAY09001	SAMN09095520	733625742	2594652	282.7	180.438	QHGS00000000	243398	458570	52125.7	78	4065807	ABAY09001	72327	72327	9084.27	11	99927	69219	69219	3289.05	42	138140	9	2	6	1
ABAY09002	SAMN09095521	857768093	3015470	284.5	218.25	QHGR00000000	110078	319833	30466.7	129	3930204	ABAY09002	111094	111094	11019.8	12	132238	110967	110967	5004.2	35	175147	6	1	4	1
ABAY09003	SAMN09095522	721526477	2466672	292.5	182.401	QHGQ00000000	223285	458570	71922.1	55	3955718	ABAY09003	8858	8858	8858	1	8858	10964	74250	4003.34	38	152127	4	1	2	1
ABAY09004	SAMN09095523	703769389	3169206	222.1	177.7	QHGP00000000	169563	458671	44004.8	90	3960431	ABAY09004	74506	74506	6006.95	19	114132	66408	66408	7203.5	12	86442	4	1	2	1
ABAY09005	SAMN09095524	878632596	4003796	219.4	215.636	QHGO00000000	160741	429821	33674.5	121	4074619	ABAY09005	10458	68126	4687.97	30	140639	67872	67872	6655.24	17	113139	7	2	5	0
ABAY09006	SAMN09095525	801757545	3192352	251.1	200.858	QHGN00000000	178117	458600	40319.8	99	3991660	ABAY09006	77658	77658	77658	1	77658	69107	69107	5943.53	17	101040	6	1	4	1
ABAY09007	SAMN09095526	782464641	3579508	218.6	197.318	QHGM00000000	147101	364364	31724.1	125	3965509	ABAY09007	74370	74370	7911.57	14	110762	68882	68882	6146.53	17	104491	3	1	1	1
ABAY09008	SAMN09095527	591452444	2435978	242.8	149.92	QHGL00000000	169046	364364	43353	91	3945119	ABAY09008	74370	74370	30199.7	3	90599	74241	74241	6817.06	16	109073	3	1	1	1
ABAY09009	SAMN09095528	707170938	3103340	227.9	175.362	QHGK00000000	110083	374407	32005.1	126	4032642	ABAY09009	3822	8005	2131.56	9	19184	54594	54594	4717.33	21	99064	7	1	5	1
ABAY09010	SAMN09095529	651196828	2637192	246.9	164.49	QHGJ00000000	132938	364364	41238.3	96	3958874	ABAY09010	74370	74370	13473.3	7	94313	74241	74241	31054.3	3	93163	4	1	2	1
ABAY09011	SAMN09095530	748206930	3421974	218.6	189.518	QHGI00000000	90987	382516	27802.5	142	3947953	ABAY09011	111094	111094	8731.18	17	148430	110967	110967	7540.4	20	150808	8	3	4	1
ABAY09012	SAMN09095531	679008287	3321654	204.4	163.94	QHGH00000000	105113	434584	26049.1	159	4141813	ABAY09012	21736	57565	6420.17	42	269647	52704	69107	10269.5	17	174582	7	2	5	0
ABAY09013	SAMN09095532	592293077	3374720	175.5	145.377	QHGG00000000	144636	368209	23550.1	173	4074174	ABAY09013	68126	68126	4364.92	26	113488	28337	38355	4234.82	28	118575	5	2	3	0
ABAY10001	SAMN09095533	1195067871	4125232	289.7	300.949	QHGF00000000	177980	458465	40938.1	97	3970997	ABAY10001	12725	19977	5408.8	10	54088	14592	54627	3987.66	32	127605	7	2	5	0
ABAY10002	SAMN09095534	1014858354	3470672	292.4	249.324	QHGE00000000	172027	429819	38766.1	105	4070445	ABAY10002	10461	27344	3943.33	18	70980	72957	72957	4084.26	34	138865	7	2	4	1
ABAY10003	SAMN09095535	842056134	3139360	268.2	216.773	QHGD00000000	69105	236554	24278.1	160	3884501	ABAY10003	3991	9898	1540.86	35	53930	79791	79791	11821.4	8	94571	3	2	1	0
ABAY10004	SAMN09095536	962879042	3354294	287.1	238.363	QHGC00000000	172289	429820	53860.7	75	4039555	ABAY10004	49849	49849	9190.86	7	64336	10563	72960	3474.09	45	156334	7	2	5	0
ABAY10005	SAMN09095537	744922072	2625722	283.7	183.053	QHGB00000000	172026	406616	41952.8	97	4069425	ABAY10005	9734	9734	6512	2	13024	10510	47297	3519.98	42	147839	7	2	5	0
ABAY10006	SAMN09095538	1415484061	4912458	288.1	347.429	QHGA00000000	172024	429820	37723.8	108	4074171	ABAY10006	47975	47975	5977.06	16	95633	9756	70484	3293.84	51	167986	7	2	5	0
ABAY10007	SAMN09095539	966484646	3285746	294.1	245.501	QHFZ00000000	147866	435224	42791.1	92	3936785	ABAY10007	8858	11961	4014.18	11	44156	7059	30247	3228.37	54	174332	3	0	1	2
ABAY11001	SAMN09095540	805999315	2750680	293	206.723	QHFY00000000	160496	466828	51985.7	75	3898929	ABAY11001	73369	73369	12231.6	8	97853	11619	73020	3896.1	40	155844	2	0	1	1
ABAY11002	SAMN09095541	702349396	2557806	274.6	172.839	QHFX00000000	144636	428696	31258.5	130	4063600	ABAY11002	24450	48498	4505.05	37	166687	30672	42769	3383.51	41	138724	7	2	5	0
ABAY11003	SAMN09095542	638261203	2251506	283.5	158.113	QHFW00000000	140907	428696	33922.3	119	4036748	ABAY11003	24450	48626	4727.17	30	141815	30672	42769	3940.43	35	137915	6	2	4	0
ABAY11004	SAMN09095543	800520170	3427246	233.6	196.292	QHFV00000000	112429	227998	32112	127	4078219	ABAY11004	9462	13213	2971.15	34	101019	80467	80467	3740.41	37	138395	8	2	6	0
ABAY11005	SAMN09095544	723770115	2452882	295.1	179.851	QHFU00000000	147572	466934	31938.7	126	4024282	ABAY11005	12734	43313	6289.17	18	113205	2276	8731	1897.25	20	37945	4	0	3	1
ABAY11006	SAMN09095545	675368961	2558628	264	172.902	QHFT00000000	159684	353196	48223.1	81	3906073	ABAY11006	73733	73733	7690.79	19	146125	72959	72959	5628.5	22	123827	2	0	1	1
ABAY11007	SAMN09095546	877394580	3674812	238.8	218.857	QHFS00000000	132845	458569	43107.4	93	4008989	ABAY11007	74371	74371	16247.7	6	97486	74242	74242	3724.03	34	126617	8	1	6	1
ABAY11008	SAMN09095547	836737662	2832140	295.4	218.773	QHFR00000000	160496	466940	51685	74	3824687	ABAY11008	150767	150767	13923.1	17	236692	8731	11619	2522.14	22	55487	2	0	1	1
ABAY11009	SAMN09095548	843236309	3226500	261.3	212.933	QHFQ00000000	166884	458570	47144	84	3960100	ABAY11009	27889	53654	7764.25	16	124228	74249	74249	3818.25	36	137457	4	1	2	1
ABAY11010	SAMN09095549	992428424	3679938	269.7	246.536	QHFP00000000	174888	364364	33545.7	120	4025488	ABAY11010	71014	167444	11555.1	30	346652	70887	70887	4138.14	28	115868	5	0	5	0
ABAY11011	SAMN09095550	789984449	3308066	238.8	198.042	QHFO00000000	160740	458691	38355.4	104	3988965	ABAY11011	73391	73391	5236.32	25	130908	27503	38398	4713.4	25	117835	4	0	4	0
ABAY11012	SAMN09095551	728793032	2611548	279.1	182.793	QHFN00000000	158474	364261	31148.3	128	3986978	ABAY11012	8858	13213	3060.05	20	61201	72082	72082	3783.08	36	136191	3	0	3	0
ABAY11013	SAMN09095552	1127636598	3920654	287.6	287.826	QHFM00000000	169334	458527	36960.1	106	3917768	ABAY11013	79638	79638	6213.82	22	136704	10749	72125	3288.44	52	170999	4	0	4	0
ABAY11014	SAMN09095553	837210790	3042752	275.1	209.923	QHFL00000000	143292	364,640	35293.7	113	3988188	ABAY11014	13213	45444	5142.37	19	97705	72082	72082	3840.32	37	142092	4	0	4	0
ABAY11015	SAMN09095554	1046583017	4141110	252.7	262.397	QHFK00000000	167065	458727	31908.4	125	3988551	ABAY11015	30944	73391	5277.91	32	168893	73262	73262	3626.8	40	145072	4	0	4	0
ABAY12001	SAMN09095555	1090842747	4397820	248	268.474	QHFJ00000000	139628	408004	33859.3	120	4063116	ABAY12001	73214	78147	7948.61	28	222561	72960	72960	5374.91	23	123623	5	2	3	0
ABAY12002	SAMN09095556	956358406	3357020	284.9	240.764	QHFI00000000	223663	458527	38943	102	3972189	ABAY12002	73387	73387	13766.1	7	96363	73262	73262	5187.58	24	124502	5	0	5	0
ABAY12003	SAMN09095557	1132099346	4197598	269.7	283.902	QHFH00000000	169334	458847	36251.2	110	3987637	ABAY12003	6323	16766	2743.22	32	87783	72082	72082	3894.73	37	144105	4	0	4	0
ABAY12004	SAMN09095558	1024312954	3645402	281	256.719	QHFG00000000	166814	458847	35625.2	112	3990021	ABAY12004	8858	20176	3114.07	30	93422	12959	72082	3542.98	43	152348	4	0	4	0
ABAY12005	SAMN09095559	1732184172	6388122	271.2	434.762	QHFF00000000	223664	458804	37235.6	107	3984212	ABAY12005	73391	73391	8409.46	13	109323	10725	72074	2904.41	61	177169	4	0	4	0
ABAY12006	SAMN09095560	1920451016	7082172	271.2	481.786	QHFE00000000	169663	458527	34661.8	115	3986109	ABAY12006	35660	73391	5474.42	33	180656	10840	52432	2736.42	67	183340	4	0	4	0
ABAY12007	SAMN09095561	1164419023	4730266	246.2	290.204	QHFD00000000	147102	461679	30397.1	132	4012418	ABAY12007	26473	74370	7179.1	21	150761	12959	74241	3523.76	45	158569	8	1	7	0
ABAY12008	SAMN09095562	872254183	3118284	279.7	218.333	QHFC00000000	223663	458858	42053.4	95	3995069	ABAY12008	73391	73391	8422.57	14	117916	73262	73262	9711	12	116532	5	0	5	0
ABAY12009	SAMN09095563	1125429550	4362472	258	292.839	QHFB00000000	212267	466940	42232.6	91	3843166	ABAY12009	7180	18363	3061.89	18	55114	17416	72082	3708.85	46	170607	1	0	1	0
ABAY12010	SAMN09095564	573221880	2274316	252	143.575	QHFA00000000	169563	458847	36628.2	109	3992479	ABAY12010	4641	12389	2512.96	24	60311	73262	73262	4110.44	34	139755	4	0	4	0
ABAY12011	SAMN09095565	504543515	2244158	224.8	126.394	QHEZ00000000	160739	458600	32192.3	124	3991841	ABAY12011	3822	13213	2268.89	27	61260	12959	38398	3644.42	38	138488	4	0	4	0
ABAY12012	SAMN09095566	1671635185	5772578	289.6	418.325	QHEY00000000	223663	458847	33864.6	118	3996021	ABAY12012	8858	21217	3122.86	28	87440	12959	67988	3303.51	45	148658	4	0	4	0
ABAY12013	SAMN09095567	2000331663	6852378	291.9	500.317	QHEX00000000	169334	458847	35697.6	112	3998126	ABAY12013	8858	19770	2750.15	20	55003	12959	72082	3320.1	50	166005	5	0	5	0
ABAY12014	SAMN09095568	8550018066	30395148	281.3	1996.54	QHEW00000000	206396	467051	9913.01	432	4282419	ABAY12014	8858	18506	2956.97	34	100537	2074	21761	1966.08	344	676332	6	1	4	1
ABAY12015	SAMN09095569	2336290977	8241608	283.5	555.52	QHEV00000000	186746	467151	21678.3	194	4205596	ABAY12015	9941	94609	4185.41	66	276237	18217	94355	4236.13	71	300765	6	1	4	1
ABAY12016	SAMN09095570	2510374844	8930586	281.1	599.47	QHEU00000000	215685	466940	20328.4	206	4187654	ABAY12016	57689	169833	8254.97	75	619123	16630	94355	3936.86	86	338570	6	1	4	1
ABAY12017	SAMN09095571	1621219659	5709786	283.9	406.241	QHET00000000	160739	458570	49268.9	81	3990782	ABAY12017	17221	19487	5179.7	10	51797	16965	74241	3840.62	45	172828	7	1	6	0
ABAY12018	SAMN09095572	1556691012	5377188	289.5	406.415	QHES00000000	160496	437060	44026.4	87	3830300	ABAY12018	17667	30144	7047.85	13	91622	7116	17418	2591.41	27	69968	2	0	1	1
ABAY12019	SAMN09095573	1218304846	4160316	292.8	317.94	QHER00000000	160496	437060	44044.5	87	3831868	ABAY12019	16722	17667	5022.73	11	55250	3879	17418	2204.67	27	59526	2	0	1	1
ABAY13001	SAMN09095574	1163108102	4006414	290.3	291.263	QHEQ00000000	160739	458570	45378.7	88	3993323	ABAY13001	42602	68613	12052.5	24	289259	21898	51323	3466.52	42	145594	7	1	6	0
ABAY13002	SAMN09095575	1491706739	5273114	282.9	373.664	QHEP00000000	160781	458570	50533	79	3992104	ABAY13002	8858	17428	3001.4	15	45021	10543	73218	3441.47	43	147983	6	1	5	0
ABAY13003	SAMN09095576	1036397742	3642050	284.6	254.727	QHEO00000000	160740	458570	27306.5	149	4068665	ABAY13003	61451	243530	11565.3	61	705482	74241	74241	4750.67	27	128268	5	2	3	0
ABAY13004	SAMN09095577	1437527199	5248144	273.9	352.901	QHEN00000000	166467	458570	25301	161	4073458	ABAY13004	105242	243276	18143.3	31	562443	20969	52704	3834.55	33	126540	5	2	3	0
ABAY13005	SAMN09095578	1392043071	4811554	289.3	331.15	QHEM00000000	206396	466940	25476.8	165	4203667	ABAY13005	17987	94609	7441.9	40	297676	17437	94355	4262.85	71	302662	6	1	4	1
ABAY13006	SAMN09095579	1262399978	4503702	280.3	317.382	QHEL00000000	223663	458847	36829.1	108	3977540	ABAY13006	8858	15343	2602	17	44234	73262	73262	4278.31	32	136906	4	0	4	0
ABAY13007	SAMN09095580	1287323135	4374060	294.3	316.724	QHEK00000000	160740	364364	32257.9	126	4064498	ABAY13007	8858	16639	2276.94	32	72862	74180	74180	3863.13	38	146799	5	2	3	0
ABAY13008	SAMN09095581	1359617937	4704644	289	334.53	QHEJ00000000	159736	458568	28421.4	143	4064261	ABAY13008	15224	28129	3972.83	24	95348	73269	73269	3744.72	39	146044	5	2	3	0
ABAY13009	SAMN09095582	1234678685	4445214	277.8	303.391	QHEI00000000	159502	458570	24664.2	165	4069593	ABAY13009	42588	65998	8040.43	40	321617	74241	74241	4692.11	27	126687	5	2	3	0
ABAY13010	SAMN09095583	1360234128	4673176	291.1	341.15	QHEH00000000	169953	364364	33789.8	118	3987201	ABAY13010	9898	13198	3637.33	21	76384	9767	31875	3491.07	43	150116	4	0	4	0
ABAY13011	SAMN09095584	902668875	3119964	289.3	226.406	QHEG00000000	149144	364364	35282.7	113	3986940	ABAY13011	14730	22922	7405.92	13	96277	22670	50083	3959.79	34	134633	4	0	4	0
ABAY13012	SAMN09095585	1002497892	3526486	284.3	251.976	QHEF00000000	167065	425953	36500.5	109	3978550	ABAY13012	9470	15089	3179	16	50864	72189	72189	4808.35	26	125017	4	0	4	0
ABAY13013	SAMN09095586	882488199	3114954	283.3	219.406	QHEE00000000	223663	458570	50913.5	79	4022163	ABAY13013	33712	71305	16492.2	9	148430	70891	70891	4317.52	29	125208	6	2	3	1
ABAY13014	SAMN09095587	1033597666	3548742	291.3	260.406	QHED00000000	121047	347403	39691.8	100	3969177	ABAY13014	70923	70923	9800.18	11	107802	11188	70796	4773.42	31	147976	3	0	1	2
ABAY13015	SAMN09095588	832119146	2840232	293	208.636	QHEC00000000	108000	332243	40697.7	98	3988376	ABAY13015	70332	70332	7929.07	14	111007	18253	69966	4708.03	33	155365	6	2	4	0
ABAY13016	SAMN09095589	983081449	3413544	288	253.369	QHEB00000000	290205	381021	66897.3	58	3880043	ABAY13016	69650	69650	28224	3	84672	69523	69523	4793.54	26	124632	2	0	1	1
ABAY13017	SAMN09095590	1233827505	4247708	290.5	317.787	QHEA00000000	169334	458942	34057.6	114	3882567	ABAY13017	6068	17429	2841.33	27	76716	72138	72138	3397.19	42	142682	4	0	4	0
ABAY13018	SAMN09095591	1273766278	4474752	284.7	316.22	QHDZ00000000	199265	458570	40281	100	4028097	ABAY13018	79447	79447	14173.9	8	113391	71051	71051	4094.75	32	131032	5	2	2	1
ABAY13019	SAMN09095592	928861012	3172468	292.8	230.875	QHDY00000000	223597	458570	45204.8	89	4023225	ABAY13019	72203	72203	17353	6	104118	19151	52509	3766.17	35	131816	5	2	2	1
ABAY14001	SAMN09095593	974242241	3331644	292.4	244.426	QHDX00000000	159690	452354	41519.2	96	3985842	ABAY14001	75128	75128	15099.8	8	120798	12186	70760	4175.5	38	158669	5	1	3	1
ABAY14002	SAMN09095594	1098337784	3838322	286.2	281.729	QHDW00000000	150335	378280	49348.8	79	3898556	ABAY14002	69650	69650	28224	3	84672	69523	69523	4409.48	29	127875	2	0	1	1
ABAY14003	SAMN09095595	1237951406	4216010	293.6	311.341	QHDV00000000	159363	364364	43694.4	91	3976186	ABAY14003	10099	18073	8095.8	5	40479	12305	72052	3955.9	41	162192	4	1	2	1
ABAY14004	SAMN09095596	1289064786	4476924	287.9	329.859	QHDU00000000	198287	383081	57469.4	68	3907922	ABAY14004	69650	69650	28224	3	84672	69523	69523	4662.26	27	125881	3	1	1	1
ABAY14005	SAMN09095597	1232014780	4287118	287.4	307.804	QHDT00000000	223663	458570	43984.5	91	4002589	ABAY14005	10579	11092	5596	6	33576	19151	52509	4177.03	30	125311	6	2	3	1
ABAY14006	SAMN09095598	1052520295	3660668	287.5	264.959	QHDS00000000	81970	241641	32560.5	122	3972385	ABAY14006	41682	91866	15940.8	32	510106	11162	70796	3530.52	44	155343	3	0	1	2
ABAY14007	SAMN09095599	750118731	2688458	279	187.68	QHDR00000000	117381	260685	40371.7	99	3996803	ABAY14007	8858	8858	8858	1	8858	70805	70805	4092	32	130944	4	0	1	3
ABAY14008	SAMN09095600	1040789657	3726734	279.3	266.201	QHDQ00000000	192383	378280	56663.7	69	3909796	ABAY14008	69650	69650	12060.5	8	96484	69523	69523	4960.25	24	119046	3	1	1	1
ABAY14009	SAMN09095601	705578441	2495110	282.8	178.33	QHDP00000000	114835	260685	40373.4	98	3956595	ABAY14009	50406	70923	14568.1	11	160249	70796	70796	4157.71	34	141362	3	0	1	2
ABAY14010	SAMN09095602	1011334557	3542472	285.5	255.009	QHDO00000000	102231	347432	34788.4	114	3965872	ABAY14010	44822	91719	15880.1	48	762245	11086	70796	4258.51	35	149048	3	0	1	2
ABAY14011	SAMN09095603	889252439	3258016	272.9	223.888	QHDN00000000	121245	222305	39325.3	101	3971860	ABAY14011	70923	70923	18159	5	90795	70796	70796	9512.54	13	123663	3	0	1	2
ABAY14012	SAMN09095604	926872874	3345972	277	234.186	QHDM00000000	110083	220466	34119.4	116	3957849	ABAY14012	8880	11961	4013.75	12	48165	70805	70805	5325.04	24	127801	4	0	3	1
ABAY14013	SAMN09095605	651425944	2246210	290	166.588	QHDL00000000	199268	458390	54311.1	72	3910398	ABAY14013	17946	17946	11388	3	34164	2069	8731	2600.75	8	20806	6	1	4	1
ABAY14014	SAMN09095606	793132215	2686164	295.3	202.858	QHDK00000000	199268	458570	55854.1	70	3909787	ABAY14014	17946	25008	10192.8	6	61157	2150	8731	2534.38	8	20275	6	1	4	1
ABAY15001	SAMN09095607	835562631	2821912	296.1	208.559	QHDJ00000000	177981	434735	56427.6	71	4006361	ABAY15001	7371	8858	6211.33	3	18634	10797	74241	4010.55	38	152401	6	2	3	1
ABAY15002	SAMN09095608	786093962	2724868	288.5	200.296	QHDI00000000	168598	458570	37737.1	104	3924661	ABAY15002	24043	39661	4858.04	23	111735	1909	8731	2671	7	18697	3	1	1	1
ABAY15003	SAMN09095609	829588094	2879578	288.1	213.494	QHDH00000000	130983	251467	43175.2	90	3885766	ABAY15003	8858	10196	5008.6	5	25043	8731	12652	3343.12	17	56833	4	0	2	2
ABAY15004	SAMN09095610	852856821	2951184	289	213.467	QHDG00000000	142377	458509	50573	79	3995265	ABAY15004	8858	8858	8858	1	8858	72194	72194	4445.55	31	137812	7	1	5	1
ABAY15005	SAMN09095611	662777118	2257790	293.6	165.911	QHDF00000000	132840	458509	48716.8	82	3994780	ABAY15005	8858	14246	7284.25	4	29137	72072	72072	4274.33	33	141053	7	1	5	1
ABAY15006	SAMN09095612	687712132	2337110	294.3	173.208	QHDE00000000	103682	246546	40105.6	99	3970451	ABAY15006	8916	13008	4694.33	6	28166	11332	44594	3691.32	47	173492	3	0	1	2
ABAY15007	SAMN09095613	965039545	3421240	282.1	235.485	QHDD00000000	130716	364365	23965.4	171	4098091	ABAY15007	7371	10211	3238.29	14	45336	8731	39917	3349.04	46	154056	5	1	3	1
ABAY15008	SAMN09095614	702526314	2515054	279.3	175.813	QHDC00000000	142377	458509	51894.3	77	3995863	ABAY15008	8858	8858	8858	1	8858	73262	73262	4715.96	28	132047	7	1	5	1
ABAY15009	SAMN09095615	681209853	2347292	290.2	172.324	QHDB00000000	135853	260815	52014.3	76	3953085	ABAY15009	70923	70923	15994.3	6	95966	70796	70796	4358.44	32	139470	3	0	1	2
ABAY15010	SAMN09095616	712533410	2831436	251.7	180.017	QHDA00000000	135853	250521	47688.5	83	3958142	ABAY15010	70923	70923	15994.3	6	95966	70796	70796	6489.32	19	123297	3	0	1	2
ABAY15011	SAMN09095617	706636265	2388484	295.9	176.627	QHCZ00000000	158158	364364	56348.3	71	4000731	ABAY15011	70923	70923	32575.7	3	97727	70796	70796	6319.5	16	101112	7	1	5	1
